# Supplementary material for: pH-Controlled selective synthesis of lactate from pyruvate with a photoredox system of water-soluble zinc porphyrin, an electron mediator and platinum nanoparticles dispersed by polyvinylpyrrolidone
Source: Royal Society of Chemistry journal article supplement (doi:10.1039/d1se01399h), 2021-01-01
Supplement: d1se01399h1.pdf [file d1se01399h1.pdf]

Electronic Supplementary Information

**pH-Controlled selective synthesis of lactate from pyruvate with  
the photoredox system of water-soluble zinc porphyrin,  
electron mediator and platinum nanoparticles dispersed by  
polyvinylpyrrolidone**

Yu Kita<sup>a</sup> and Yutaka Amao<sup>\*a,b</sup>

<sup>a</sup> Graduate School of Science, Osaka City University, 3-3-138 Sugimoto, Sumiyoshi-ku, Osaka 558-8585, Japan

<sup>b</sup> Research Centre for Artificial Photosynthesis (ReCAP), Osaka City University, 3-3-138 Sugimoto, Sumiyoshi-ku, Osaka 558-8585, Japan

E-mail: amao@osaka-cu.ac.jp

Table of Contents for Supporting Information

|                                                                                                                                                                                                                    |   |
|--------------------------------------------------------------------------------------------------------------------------------------------------------------------------------------------------------------------|---|
| Figure S1. Time dependence of UV-vis absorption changes in the solution of TEOA, MV <sup>2+</sup> and ZnTPPS with irradiation under various pH conditions. (a) pH 6.0, (b) 6.5, (c) 7.0, (d) 7.5 and (e) 8.0. .... | 2 |
| Figure S2. The chart of HPLC of the L- and D- lactate sample solution. ....                                                                                                                                        | 3 |
| Figure S3. Relationship between the L- and D- lactate concentration and the detection peak area. ....                                                                                                              | 3 |

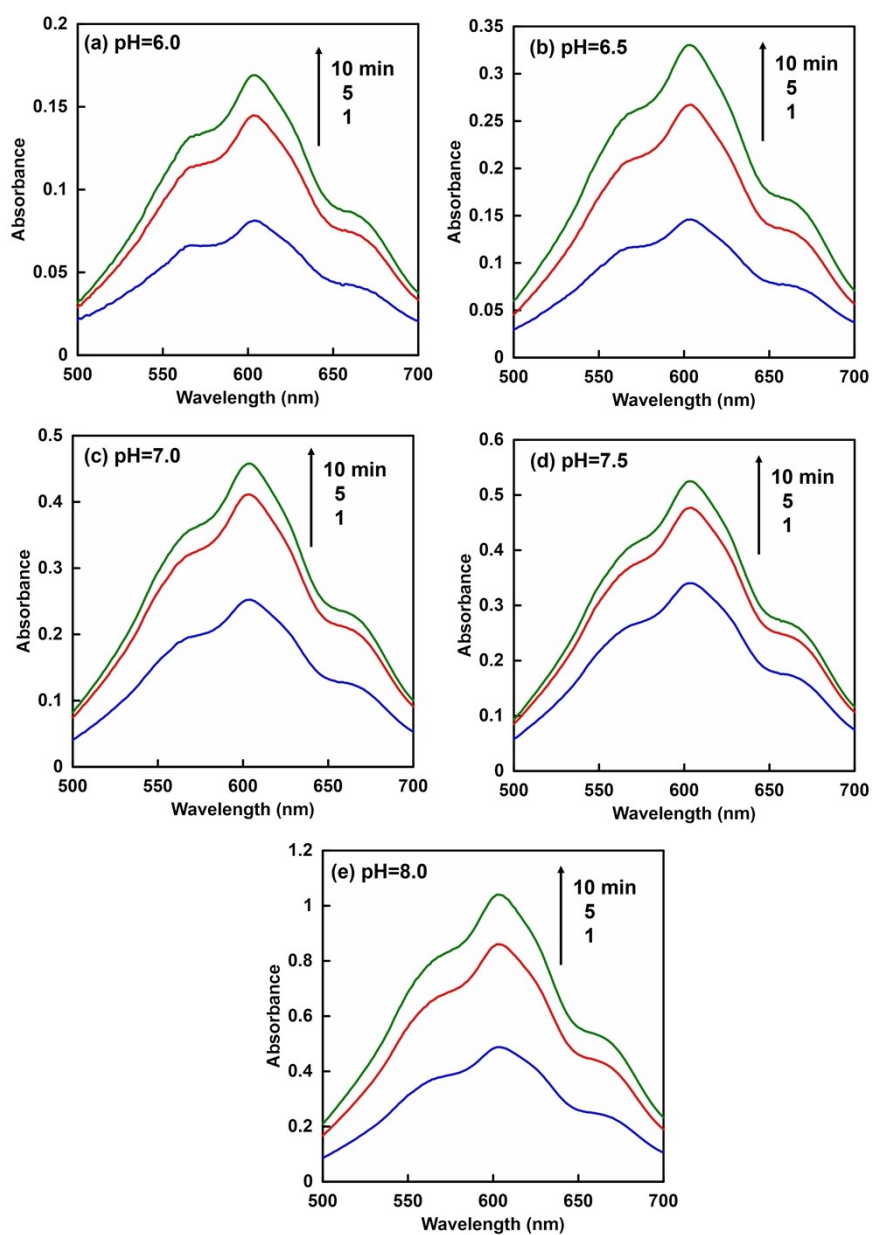

Figure S1. Time dependence of UV-vis absorption changes in the solution of TEOA,  $MV^{2+}$  and ZnTPPS with irradiation under various pH conditions. (a) pH 6.0, (b) 6.5, (c) 7.0, (d) 7.5 and (e) 8.0.

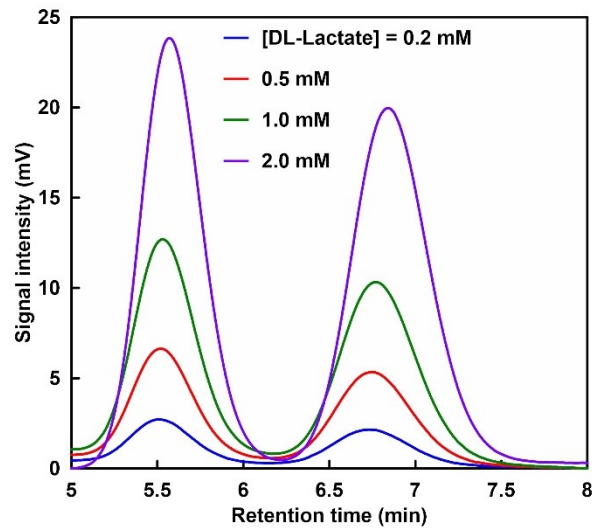

Figure S2. The chart of HPLC of the L- and D- lactate sample solution.

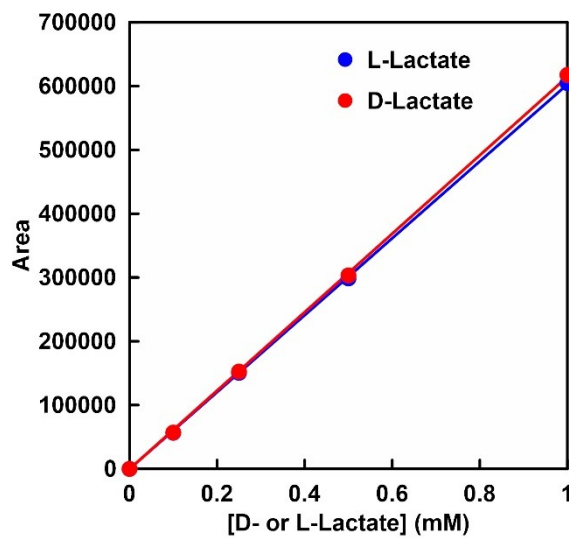

Figure S3. Relationship between the L- and D- lactate concentration and the detection peak area.

As shown in Figure S3, the L- and D- lactate concentration and the detected peak area showed a good linear relationship as following equation (eqns S1-1 and 2).

For L-lactate:

$$\text{Peak area} = 614791 \times [\text{L-Lactate}] \text{ (mM)} \text{ (correlation coefficient } r^2=0.999) \quad (\text{S1-1})$$

For D-lactate:

$$\text{Peak area} = 602888 \times [\text{D-Lactate}] \text{ (mM)} \text{ (} r^2=0.999) \quad (\text{S1-2})$$
